# Supplementary material
Source: publisher figshare collection journal article supplement (https://sage.figshare.com/ndownloader/files/20537379)
Supplement: Supplementary file 1 [file 20537379]

Figure 1. Treatment success, partial success and failure rates in all patients.

Figure 2. Treatment success, partial success and failure rates by age groups.

Table 1. clinical outcome according to age group (N=270 eyes).

| Age group | N | Success  N (%) | Success  95% CI | Partial success  N (%) | Partial success 95% CI | Failure  N (%) | Failure  95% CI |
| --- | --- | --- | --- | --- | --- | --- | --- |
| | under 18 months | | --- | | 60 | 51 (85) | 73%-91% | 2 (3) | 1%-11% | 7 (12) | 6%-22% |
| 18-36 months | 133 | 124 (93) | 87%-96% | 4 (3) | 1%-7% | 5 (4) | 2%-9% |
| | above 36 months | | --- | | 77 | 59 (77) | 66%-85% | 3 (4) | 1%-11% | 15 (19) | 12%-30% |
